# Supplementary material
Source: PubMed Central journal article supplement (PMC7755832)
Supplement: NIHMS1634683-supplement-1.pdf [file NIHMS1634683-supplement-1.pdf]

## Supplementary information

Structure and reconstitution of a hydrolase complex that may release peptidoglycan from the membrane after polymerization

Kaitlin Schaefer,<sup>1</sup>‡ Tristan W. Owens,<sup>2</sup>‡ Julia E. Page,<sup>1</sup> Marina Santiago,<sup>1</sup> Daniel Kahne,<sup>2</sup> Suzanne Walker <sup>1\*</sup>

<sup>1</sup> Department of Microbiology, Harvard Medical School, Boston, Massachusetts 02115

<sup>2</sup> Department of Chemistry and Chemical Biology, Harvard University, Cambridge, Massachusetts 02138

‡ These authors contributed equally.

\*Correspondence to: [suzanne\\_walker@hms.harvard.edu](mailto:suzanne_walker@hms.harvard.edu)

| Beta lactam treatment | Gene number       | Gene name   | Corrected p-value | Ratio  |
|-----------------------|-------------------|-------------|-------------------|--------|
| Oxacillin             | USA300HOU_RS09425 | <i>sagB</i> | 1.48E-13          | 0.0358 |
|                       | USA300HOU_RS12635 | <i>spdC</i> | 5.26E-17          | 0.0599 |
| Cefoxitin             | USA300HOU_RS09425 | <i>sagB</i> | 1.84E-06          | 5.0994 |
|                       | USA300HOU_RS12635 | <i>spdC</i> | 4.48E-11          | 6.2723 |
| Mecillinam            | USA300HOU_RS09425 | <i>sagB</i> | 6.16E-07          | 0.1675 |
|                       | USA300HOU_RS12635 | <i>spdC</i> | 4.19E-06          | 0.2869 |

**Supplementary Table 1. Treatment of a methicillin-resistant *Staphylococcus aureus* transposon library with sublethal concentrations of beta-lactams identified *sagB* and *spdC* as the only two genes with a unique cell wall phenotype.** Genes significantly enriched and depleted under cefoxitin, mecillinam, or oxacillin conditions were identified using a two-sided Mann-Whitney U test corrected for multiple hypothesis testing using the Benjamini-Hochberg method.

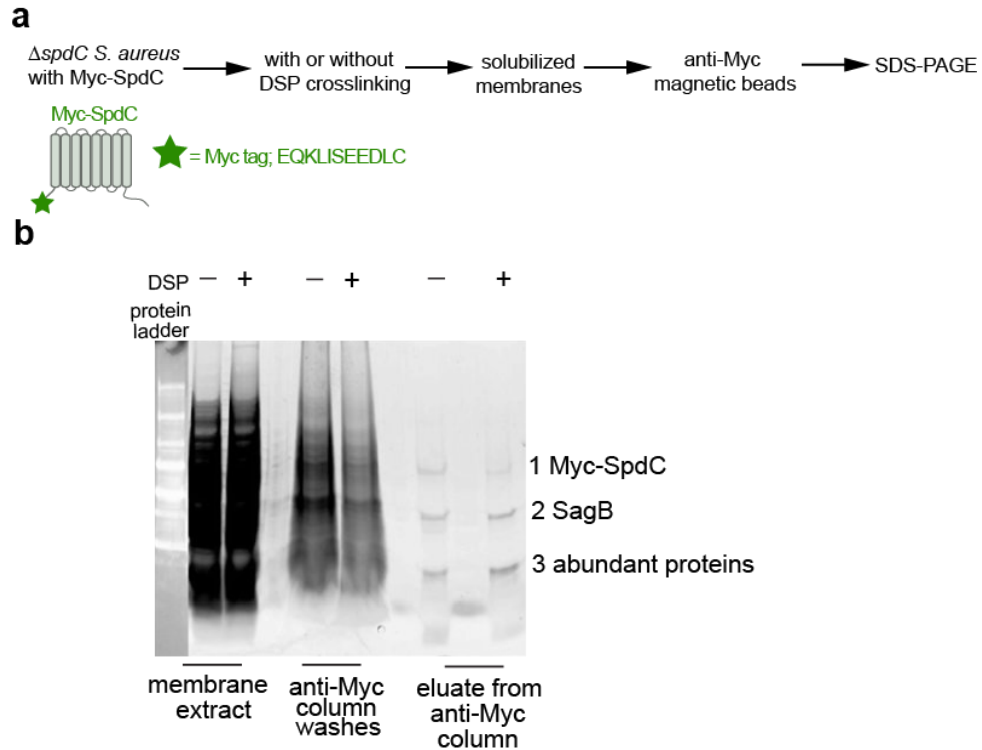

**Supplementary Figure 1. The interaction between SagB and SpdC was first observed by co-immunoprecipitation of SagB with a Myc-epitope tagged SpdC in a *S. aureus*  $\Delta spdC$  background.** Untreated cells and cells treated with a chemical crosslinker, DSP (dithiobis(succinimidyl propionate); Thermo Scientific, Catalog # 22585), were lysed and their membranes isolated. Solubilized cell membranes were applied to anti-myc magnetic beads, which were washed extensively before bound proteins were eluted and then analyzed using SDS-PAGE. Protein bands from the sample without crosslinker (1-3) were then subjected to LC-MS-MS analysis, which identified the middle band as SagB (Supplementary Table 2).

## Band 1:

| Unique peptides | Total peptides | Reference           | Gene symbol          | MW (kDa) |
|-----------------|----------------|---------------------|----------------------|----------|
| 35              | 102            | P02976_SPA_STAA8    | <i>spa</i>           | 56.40    |
| 16              | 17             | Q2FY15_Q2FY15_STAA8 | <i>SAOUHSC_01659</i> | 51.05    |
| 14              | 15             | Q2FWW1_Q2FWW1_STAA8 | <i>SAOUHSC_02161</i> | 65.53    |
| 13              | 14             | Q2FWF0_ATPB_STAA8   | <i>atpD</i>          | 51.37    |
| 13              | 14             | Q2FWH5_Y2316_STAA8  | <i>SAOUHSC_02316</i> | 56.91    |
| 13              | 13             | Q2FYZ4_GLPD_STAA8   | <i>glpD</i>          | 62.35    |
| 12              | 14             | Q2FWE8_ATPA_STAA8   | <i>atpA</i>          | 54.55    |
| 12              | 12             | Q2FV16_Q2FV16_STAA8 | <i>mgo</i>           | 55.96    |
| 11              | 21             | Q2FVT1_LYRA_STAA8   | <b><i>spdC</i></b>   | 46.76    |
| 10              | 10             | Q2G0N0_EFTU_STAA8   | <i>tuf</i>           | 43.08    |

## Band 2:

| Unique peptides | Total peptides | Reference           | Gene symbol          | MW (kDa) |
|-----------------|----------------|---------------------|----------------------|----------|
| 15              | 30             | P60430_RL2_STAA8    | <i>rplB</i>          | 30.14    |
| 12              | 16             | Q2FWW9_Q2FWW9_STAA8 | <i>SAOUHSC_02152</i> | 32.93    |
| 12              | 13             | Q2FXF4_Q2FXF4_STAA8 | <b><i>sagB</i></b>   | 32.49    |
| 11              | 11             | Q2G2S6_PRSA_STAA8   | <i>prsA</i>          | 35.62    |
| 10              | 10             | Q2FXZ9_Y1676_STAA8  | <i>SAOUHSC_01676</i> | 35.16    |
| 10              | 10             | Q2G2D8_Q2G2D8_STAA8 | <i>SAOUHSC_00634</i> | 35.05    |
| 9               | 15             | Q2FW06_RL3_STAA8    | <i>rplC</i>          | 23.7     |
| 8               | 14             | Q2G0B5_Q2G0B5_STAA8 | <i>SAOUHSC_00690</i> | 26.67    |
| 8               | 8              | Q2FVL2_Q2FVL2_STAA8 | <i>SAOUHSC_02699</i> | 28.89    |
| 8               | 8              | Q2G0N0_EFTU_STAA8   | <i>tuf</i>           | 43.08    |

## Band 3:

| Unique peptides | Total peptides | Reference           | Gene symbol          | MW (kDa) |
|-----------------|----------------|---------------------|----------------------|----------|
| 10              | 10             | Q2G0F2_Q2G0F2_STAA8 | <i>SAOUHSC_00617</i> | 18.58    |
| 9               | 29             | Q2FXS8_RL21_STAA8   | <i>rplU</i>          | 11.33    |
| 9               | 9              | Q2FW30_RS13_STAA8   | <i>rpsM</i>          | 13.71    |
| 8               | 16             | Q2FXQ1_RL20_STAA8   | <i>rplT</i>          | 13.68    |
| 7               | 8              | P0A0F8_RL15_STAA8   | <i>rplO</i>          | 15.59    |
| 7               | 8              | Q2G247_Y1855_STAA8  | <i>SAOUHSC_01855</i> | 17.99    |
| 7               | 7              | Q2FW11_RL22_STAA8   | <i>rplV</i>          | 12.83    |
| 7               | 7              | Q2FVN6_Q2FVN6_STAA8 | <i>SAOUHSC_02666</i> | 13.33    |
| 6               | 7              | Q2FW23_RS5_STAA8    | <i>rpsE</i>          | 17.73    |
| 6               | 6              | Q2FXM1_Q2FXM1_STAA8 | <i>SAOUHSC_01814</i> | 15.22    |

**Supplementary Table 2. List of proteins identified by LC-MS-MS analysis of the sample obtained from immunoprecipitation of Myc-SpdC.** Each protein band shown in Supplementary Figure 1 was analyzed separately. For each of the three bands observed in SDS-PAGE, here is the list of the top ten proteins with the highest coverage in LC-MS-MS analysis.

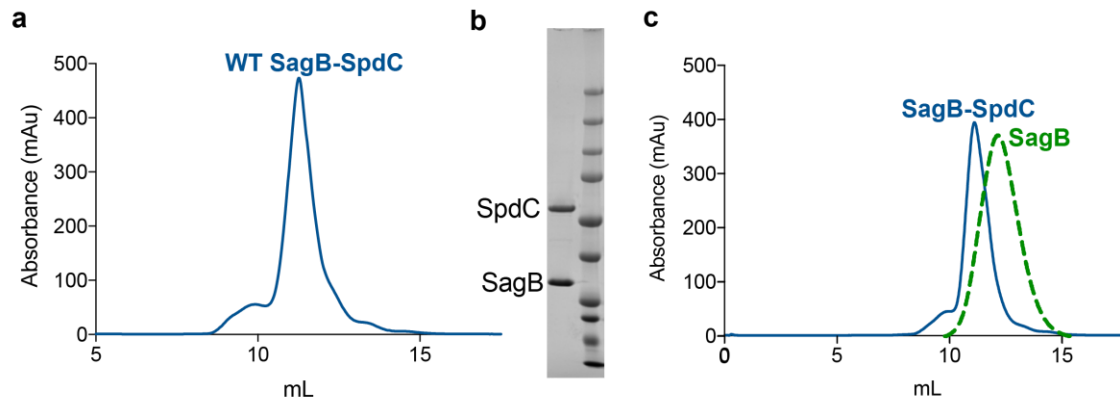

**Supplementary Figure 2. Co-purification of SagB and SpdC results in a stable SagB-SpdC complex.** **a**, An expression plasmid containing an N-terminal SUMO-FLAG epitope tag on SpdC and a C-terminal hexa-histidine tag on SagB was transformed into *E. coli* BL21-DE3 that also contained an arabinose-inducible Ulp1 protease plasmid. Purification steps included two affinity columns: nickel resin to pull down SagB-His<sub>6</sub> and an anti-FLAG M1 antibody resin to pull down an amino-FLAG-SpdC (SUMO removed by Ulp1 during co-expression). Eluate fractions were then concentrated and further purified by size exclusion chromatography with an Increase Sephadex S200 column 10/300 GL. **b**, SDS-PAGE of the dominant peak, which corresponds to the correct molecular weight of the DDM micelle, SagB, and SpdC, shows the presence of SpdC and SagB. **c**, Overlaid size exclusion chromatograms from a SagB-SpdC co-purification and a full-length SagB purification show a peak shift to a higher molecular weight in the presence of SpdC.

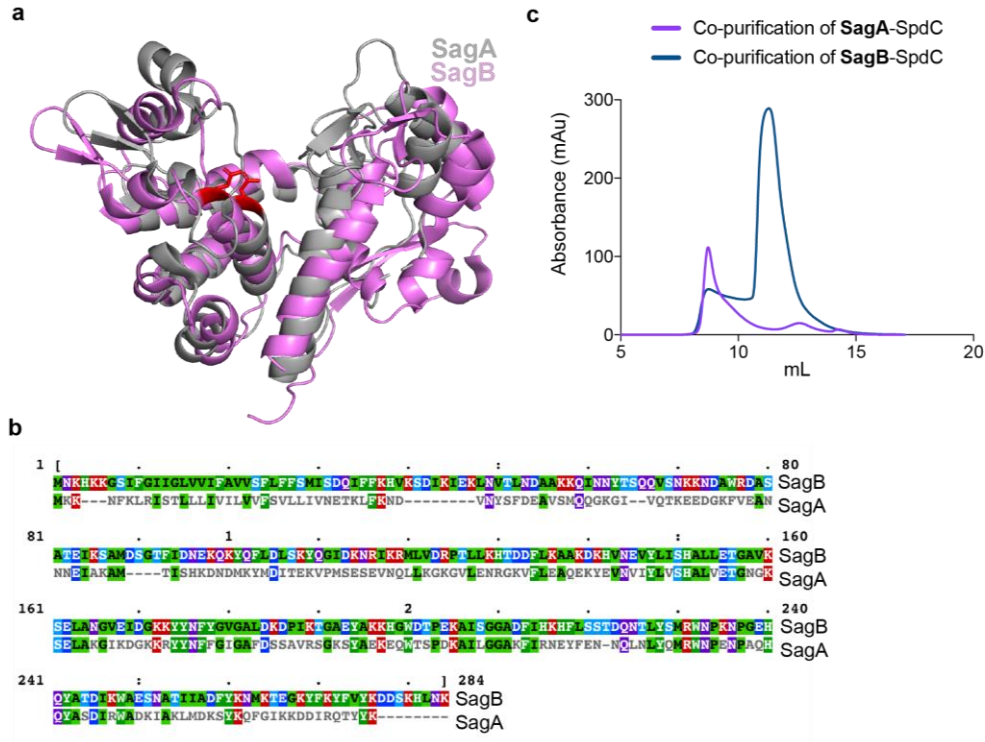

**Supplementary Figure 3. SagB is related to the other *S. aureus* membrane-anchored glucosaminidase, SagA, but SagA does not form a stable complex with SpdC.** **a**, Alignment of SagA and SagB glucosaminidase domains, colored gray and magenta, respectively (PDB# 4PIA and 6FXP)<sup>4,5</sup>. **b**, Primary sequence alignment of SagA (bottom) and SagB, with residues colored by type. Alignments were made using ClustalO and then coloured in MView (<https://www.ebi.ac.uk/Tools/msa/clustalo/>). SagA and SagB are 53% similar. **c**, Parallel attempts were made to co-purify SagB-SpdC and SagA-SpdC using FLAG-SpdC and histidine-tagged SagA or SagB. Solubilized membranes were purified on nickel resin and then anti-FLAG resin. Eluate from anti-FLAG resin was concentrated and run through a size exclusion column. A stable SagB-SpdC complex was obtained (blue trace), whereas SagA (violet trace) did not co-elute from anti-FLAG resin with FLAG-SpdC.

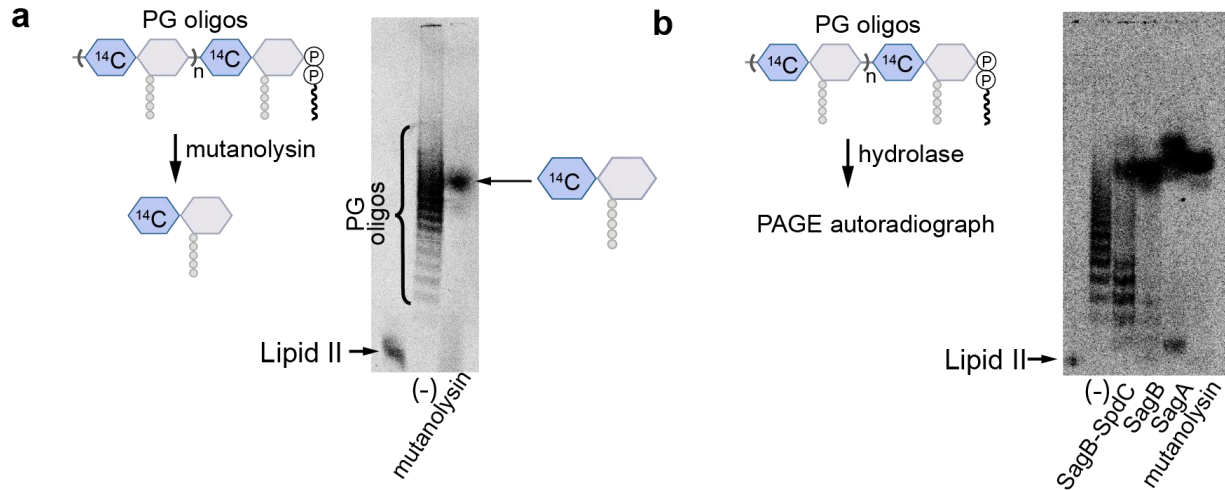

**Supplementary Figure 4. Muramidase cleavage of radiolabeled peptidoglycan oligomers results in a diffuse signal at the same approximate position as cleavage products of glucosaminidases. a,** Mutanolysin is a well-characterized muramidase that cleaves peptidoglycan strands into disaccharide units<sup>1</sup>. Radiolabeled peptidoglycan oligomers run as a ladder (lane 2), but incubation with mutanolysin (lane 3) changes the ladder to a diffuse signal that migrates towards the middle of the gel. The gel was replicated at least three times. **b,** Radiolabeled Lipid II incubated with SgtB\* (SgtB<sup>Y181D</sup>) resulted in a ladder of PG oligomers as visualized in the PAGE autoradiograph<sup>2,3</sup>. Radiolabeled product bands are similar to hydrolase reactions with PG oligomers prepared using PBP2 (see main text, Fig. 2b). PG oligomer treatment with SagB-SpdC resulted in two discrete signals on the autoradiograph, a ladder at the bottom of the gel and a signal towards the top of the gel that was also present in SagB, SagA, and mutanolysin reactions. These experiments were performed at least three times with similar results.

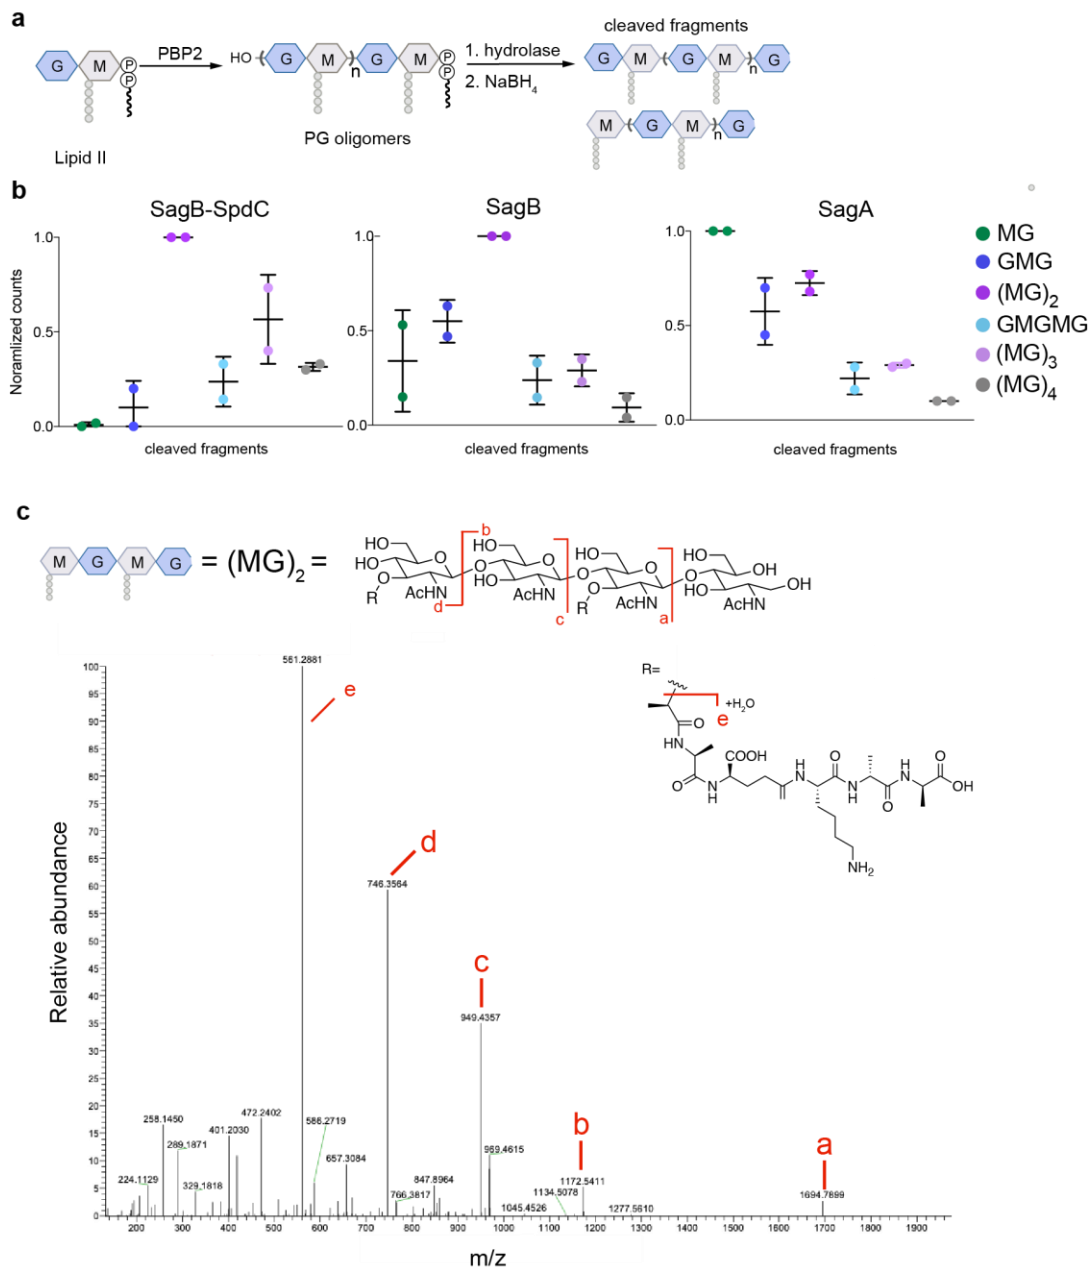

**Supplementary Figure 5. SagB, SagA, and the SagB-SpdC complex cleave peptidoglycan strands into oligosaccharide fragments, but the complex favors longer products.** **a**, This scheme shows the isolation of cleaved peptidoglycan fragments for LC-MS analysis. Peptidoglycan oligomers were incubated with a glucosaminidase (SagA, SagB, or SagB-SpdC). After the cleavage reaction, the reaction mixture was treated with sodium borohydride to reduce any lipid-free fragments<sup>1</sup>. **b**, Molecular ions corresponding to the expected mucopeptides were extracted. Integrated peak areas for the mucopeptides were normalized relative to one. The bars represent the averages of two biological experiments and the error bars represent standard deviation from the mean. These products presumably correspond to the diffuse signal and slower migrating products visualized in the PAGE autoradiograph experiments (see main text Fig. 2). These structures are consistent with glucosaminidase cleavage and also confirm the endolytic cleavage of nascent peptidoglycan oligomers. **c**, Targeted MS-MS of the tetrasaccharide cleavage product ( $(MG)_2$ ) from the SagB-SpdC reaction confirms that a GlcNAc is present on the reducing end. The  $[M]^+1$  was targeted for fragmentation.



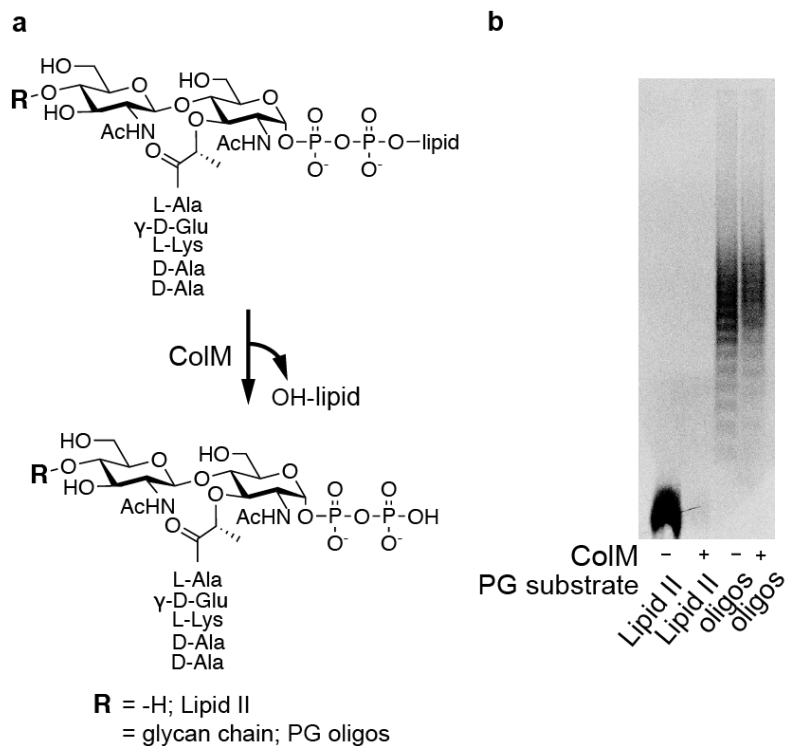

**Supplementary Figure 6. Colicin M (ColM) cleaves the lipid anchor from Lipid II and PG oligomers.** Radiolabeled Lipid II runs as a single band at the bottom of PAGE autoradiograph; the signal disappears upon treatment with ColM presumably due to its inability to stay within the gel matrix. Radiolabeled PG oligomers run as a discrete ladder. When incubated with ColM, the oligomers also react but the products migrate similarly to the longer oligos (compare lane 3 to lane 4). Mass spectrometry confirmed the reactions (Supplementary Figure 7). The experiment was replicated at least two times.

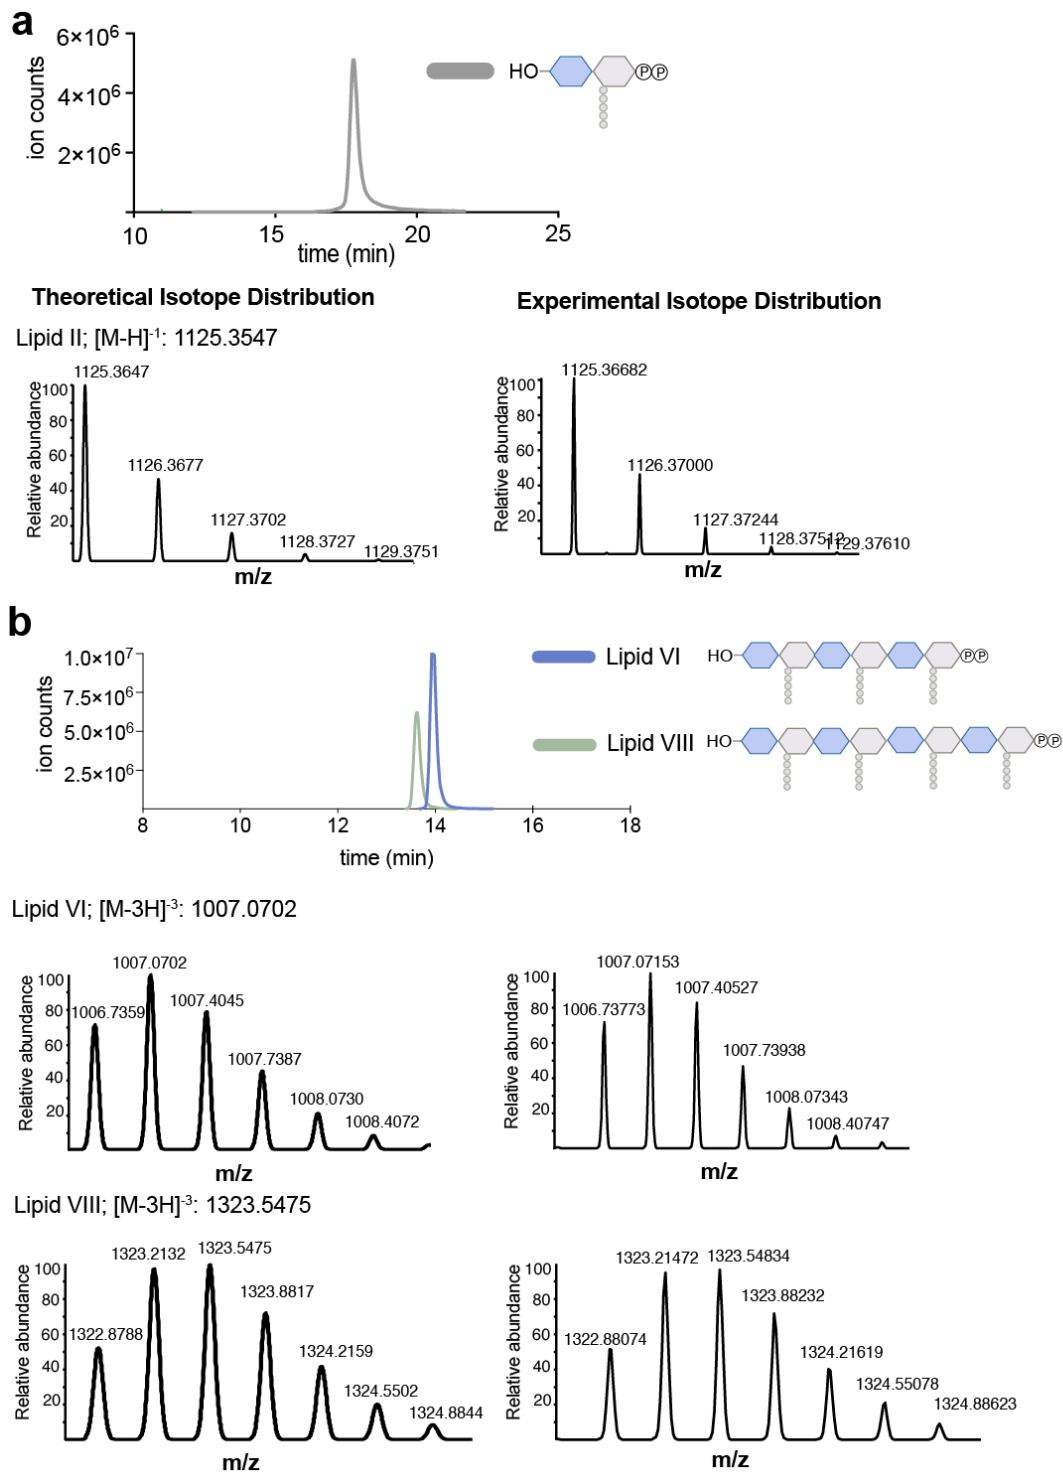

Supplementary Figure 7: CoIM cleaves both Lipid II and linear peptidoglycan strands.

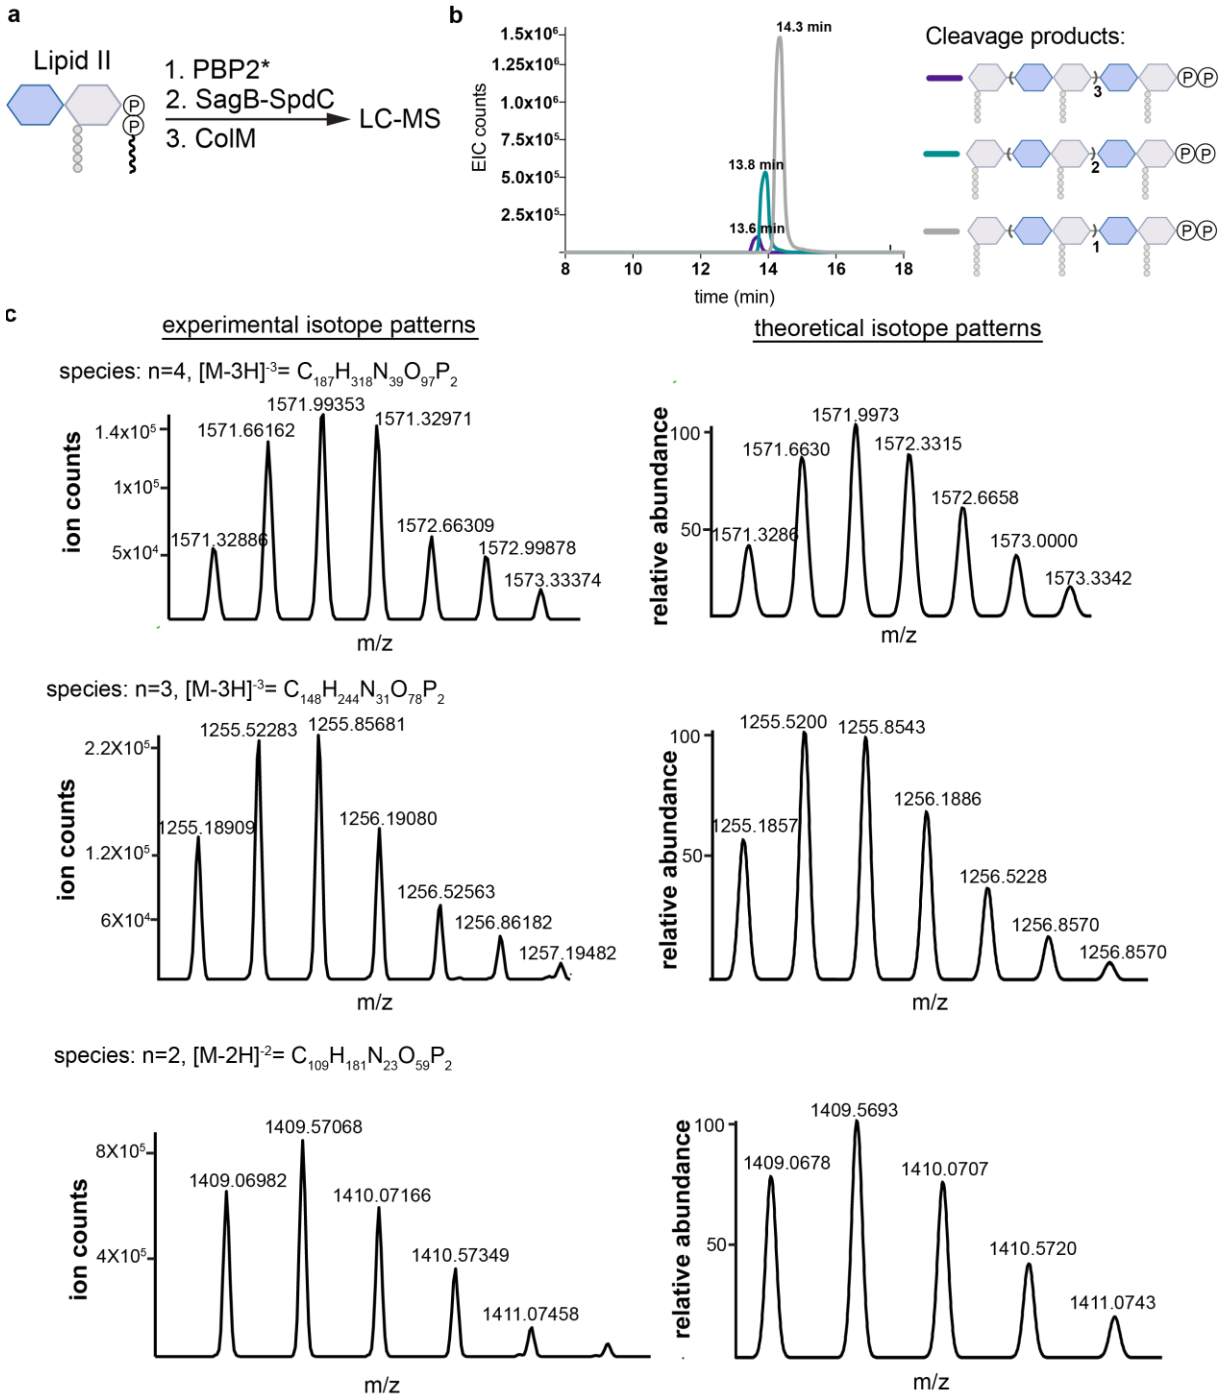

**Supplementary Figure 8. LC-MS analysis of SagB-SpdC reactions incubated with colicin M (colM) confirms the identity of short, lipid-linked cleavage products.** Pre-assembled peptidoglycan oligomers were incubated with SagB-SpdC, and then treated with ColM. Chromatogram traces and isotope patterns for three cleaved peptidoglycan oligomers containing a diphosphate indicate that ColM cleaved the lipid anchor. The odd number of sugars is consistent with glucosaminidase activity.

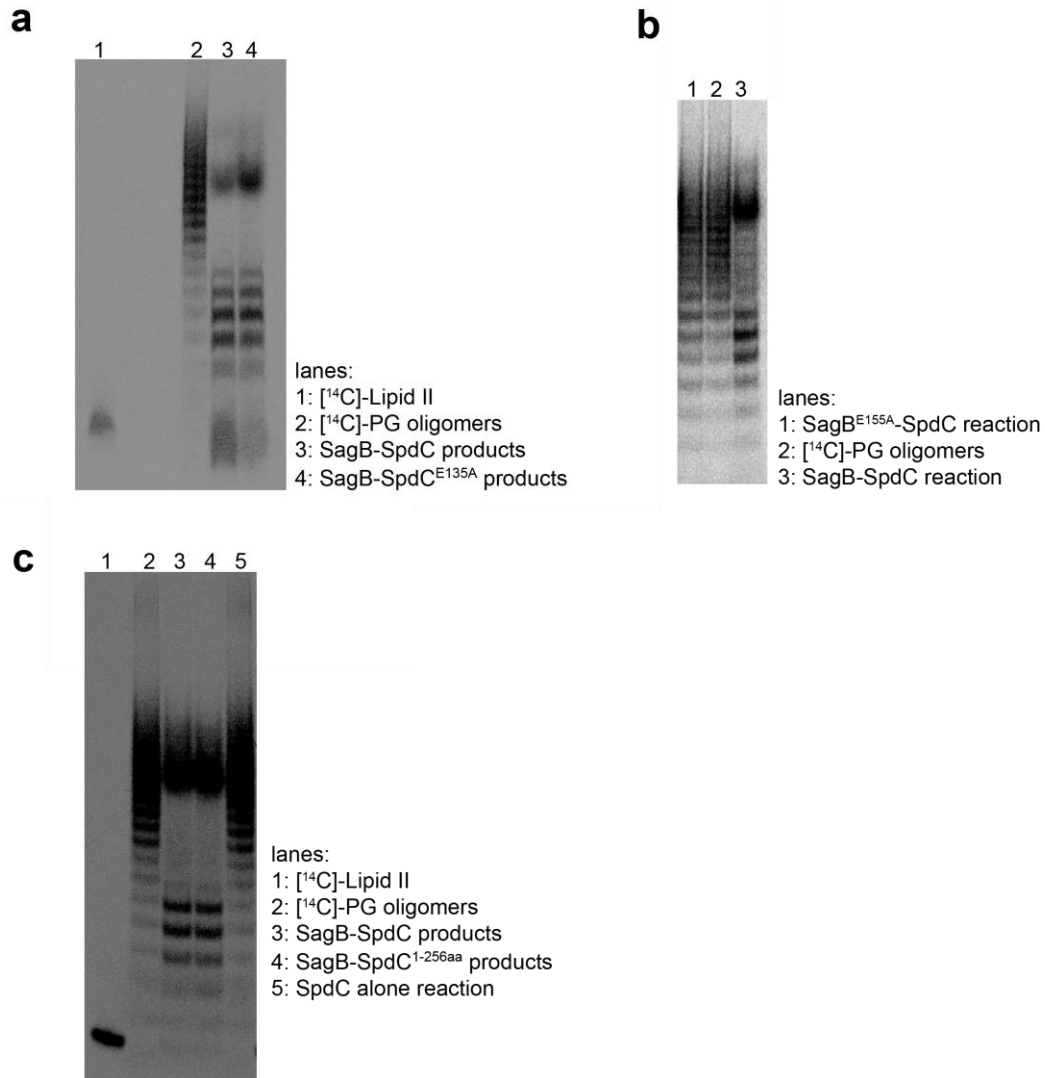

**Supplementary Figure 9. The cleavage products of SagB-SpdC require the catalytic glutamate in SagB, but not the cytoplasmic C-terminal part or the CAAX proteolytic glutamate of SpdC.** **a**, Activity of wild-type SagB-SpdC in the presence of radiolabeled peptidoglycan oligomers was tested alongside SagB-SpdC<sup>E135A</sup>, in which the proposed CAAX proteolytic active site glutamate<sup>9</sup> is mutated to an alanine. Similar cleavage products are observed, indicating that the conserved SpdC residue is not important for SagB-SpdC glucosaminidase activity. **b**, In the presence of radiolabeled peptidoglycan oligomers, the activity of wild-type SagB-SpdC was compared to the activity of a variant predicted to be catalytically inactive<sup>10</sup>, SagB<sup>E155A</sup>-SpdC. The similarity between the SagB<sup>E155A</sup>-SpdC reaction (lane 1) and control peptidoglycan oligomers (lane 2) indicates that E155 is critical for cleavage. **c**, Radiolabeled peptidoglycan oligomers (lane 2) were incubated with wild-type SagB-SpdC (lane 3), truncated SagB-SpdC<sup>1-256</sup>, which lacks the C-terminal, cytoplasmic region of SpdC (lane 4), and SpdC alone (lane 5). Purification of SagB-SpdC<sup>1-256</sup> is shown in Supplementary Fig. 10. SpdC alone does not affect the peptidoglycan oligomers, and the cytoplasmic region of SpdC is not required for the activity of the complex. The gels were replicated at least three times.

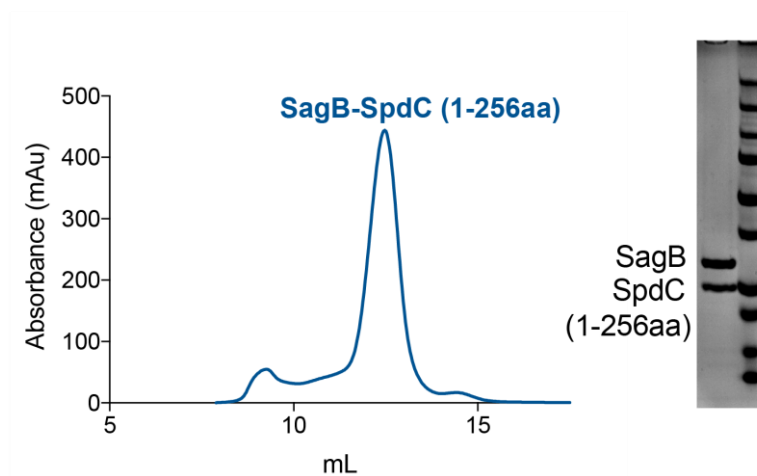

**Supplementary Figure 10. SagB and a truncated SpdC variant lacking its C-terminal, cytoplasmic region (SpdC<sup>1-256</sup>) co-purify as a stable complex.** Expression and purification conditions used to obtain SagB-SpdC<sup>1-256</sup> complex were similar to those used in purification of the wild-type SagB-SpdC complex. A stable 1:1 protein complex was obtained after tandem affinity purifications and indicates that the C-terminal cytoplasmic region of SpdC is not required for complexation. *In vitro* and *in vivo* activity of this complex is also similar to that of wild-type SagB-SpdC (see Supplementary Figure 9).

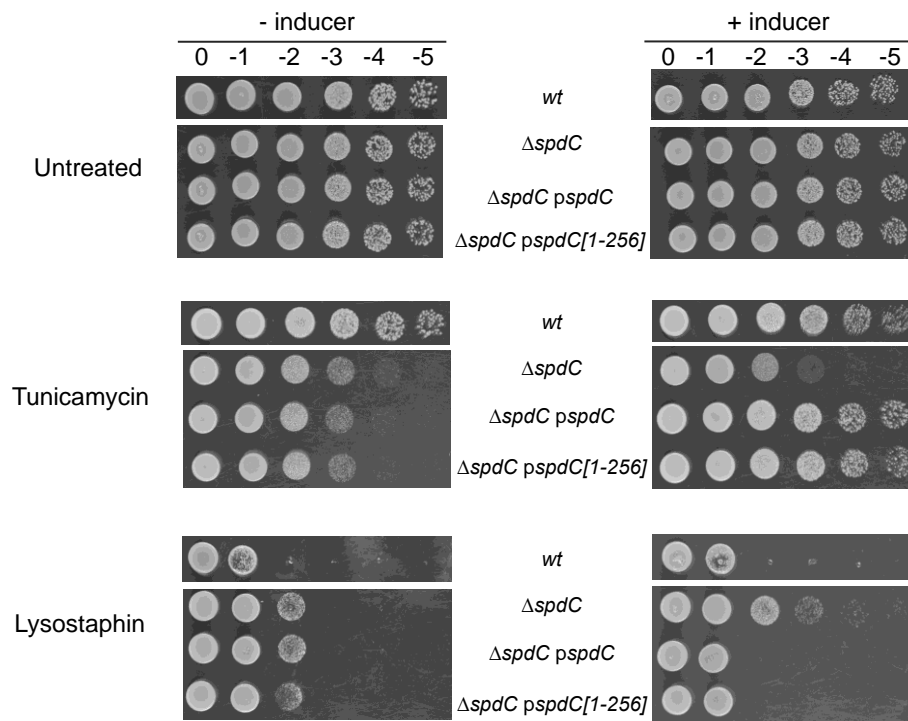

**Supplementary Figure 11. The cell wall phenotypes of SpdC are unaffected by its cytoplasmic truncation.** Spot dilution series performed as described in Extended Data Figure 3.

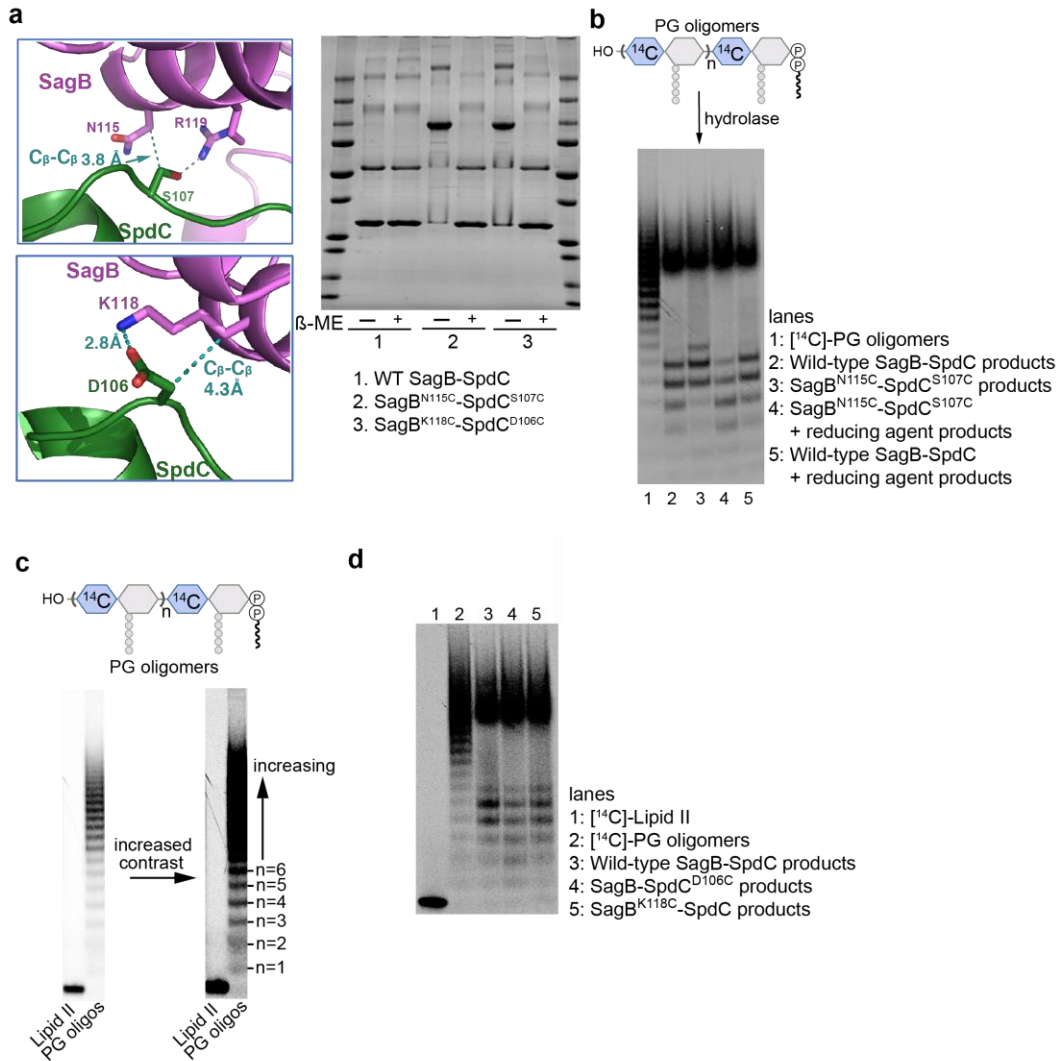

**Supplementary Figure 12. Disulfide-stabilized SagB-SpdC complexes cleave nascent peptidoglycan to a longer distribution of lipid-linked oligomers than the wild-type complex.** **a**, Close-up view of two interactions at the extracellular interface between SagB (violet) and SpdC (forest green). Sidechains of the relevant residues are shown as sticks. SpdC serine 107 hydrogen bonds to SagB arginine 119, however, its C<sub>β</sub> is closest to the C<sub>β</sub> of SagB asparagine 115. Wild-type SagB-SpdC, SagB<sup>N115C</sup>-SpdC<sup>S107C</sup>, and SagB<sup>K118C</sup>-SpdC<sup>D106C</sup> were purified and then samples were mixed with 2x SDS-PAGE loading buffer with or without β-mercaptoethanol (β-ME), run on an acrylamide gel, and stained with coomassie. **b**, To test the effects of the cysteine substitutions and disulfide formation, radiolabeled PG oligomers (lane 1) were incubated with wild-type SagB-SpdC or SagB<sup>N115C</sup>-SpdC<sup>S107C</sup> in the presence or absence of reducing agent. **c**, To assess the length (in sugar or disaccharide units) of lipid-linked, linear peptidoglycan fragments, we compare samples to Lipid II and the ladder of PG oligomers produced from it by PBP2. Each “step” in the ladder corresponds to the addition of a MurNAc-GlcNAc disaccharide. **d**, Single cysteine mutations in SagB-SpdC do not alter the distribution of cleavage products. Gels in **a-d** were repeated at least three times.

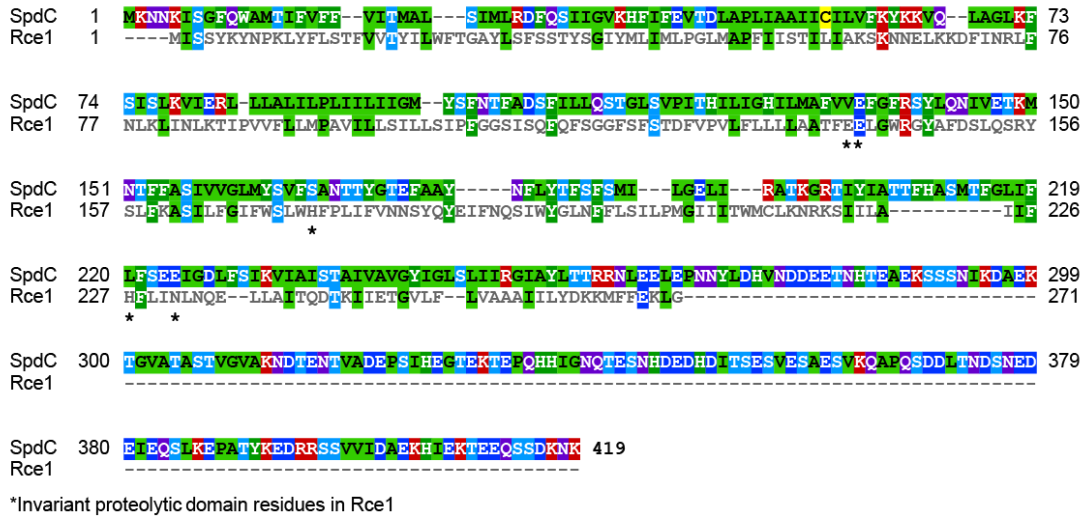

**Supplementary Figure 13. Sequence alignment of SpdC and Rce1 shows partial conservation of catalytic residues.** Sequence alignment of SpdC and Rce1 generated using Clustal Omega and colored in MView. Stars under the alignment mark positions of the catalytic residues in Rce1.



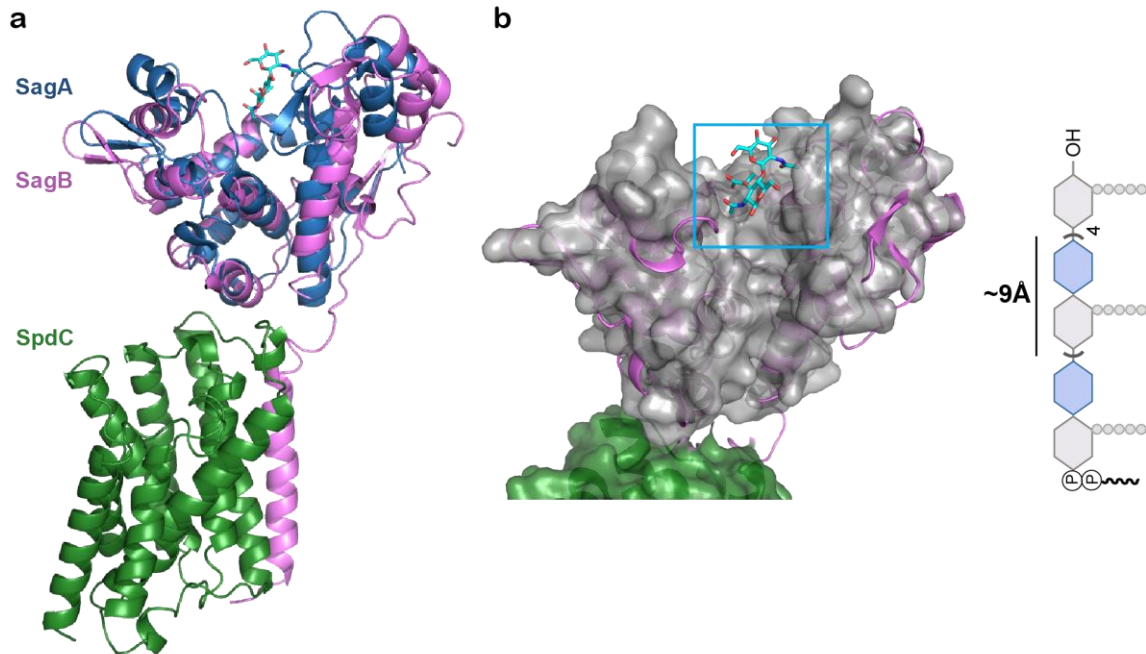

**Supplementary Figure 14. Alignment of SagB-SpdC with SagA crystal structures shows that the reducing end of a substrate glycan strand would be adjacent to the SagB-SpdC interface.** **a**, A crystal structure of SagA (blue) in complex with GlcNAc-MurNAc fragment (sticks) (PDB #4PI7) was aligned to SagB-SpdC (violet and forest green) using the glucosaminidase domain of SagB as the target. The orientation of the disaccharide fragment indicates that the reducing end faces SpdC and that the non-reducing end of the peptidoglycan substrate faces the top of the active site cleft. **b**, The same alignment shown in **a**, with SagA shown as a gray surface. The length of a disaccharide unit in the linear glycan chain is approximately 9 angstroms.

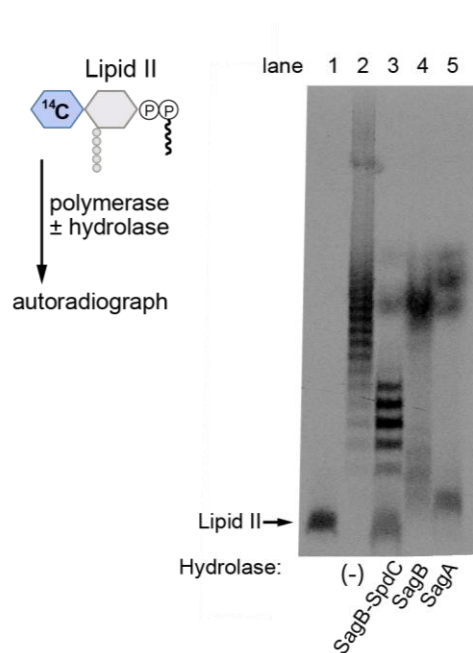

**Supplementary Figure 15. SagB-SpdC cleaves peptidoglycan oligomers with an active polymerase present.** Synthetic, [ $^{14}\text{C}$ ]-Lipid II was incubated with PBP2 and a hydrolase (SagB-SpdC, SagB, or SagA). Similar cleavage products are observed in the presence of pre-assembled peptidoglycan oligomers (see main text Fig. 2b).

| <b>Data Collection</b>                      | <b>SagB-SpdC</b>           |
|---------------------------------------------|----------------------------|
| Space Group                                 | C2                         |
| Unit Cell                                   |                            |
| Dimensions (a, b, c), Å                     | 156.7, 54.8, 96.4          |
| Angles ( $\alpha$ , $\beta$ , $\gamma$ ), ° | 90.0, 107.2, 90.0          |
| Resolution range, Å                         | 46.98 - 2.60 (2.71 - 2.60) |
| Completeness, %                             | 99.3 (97.2)                |
| $R_{\text{merge}}$                          | 0.16 (1.86)                |
| Mean $I/\sigma(I)$                          | 4.7 (0.8)                  |
| Multiplicity                                | 5.8 (5.1)                  |
| $CC_{1/2}$                                  | 0.994 (0.530)              |
| <b>Refinement</b>                           |                            |
| No. unique reflections                      | 24207                      |
| Rwork, % / Rfree, %                         | 25.3 / 27.9                |
| Average B (Å <sup>2</sup> ) protein         | 98.7                       |
| Average B (Å <sup>2</sup> ) ligands         | 121.8                      |
| Average B (Å <sup>2</sup> ) waters          | 87.7                       |
| Ramachandran plot                           |                            |
| Favored/disallowed (%)                      | 96.82 / 0.00               |
| rmsd from ideal geometry                    |                            |
| Bond lengths, Å                             | 0.0025                     |
| Bond angles, °                              | 0.49                       |
| PDB code                                    | 6U00                       |

Supplementary Table 3. Data collection and refinement statistics for SagB-SpdC<sup>1-256</sup>.

| Primer Name | Sequence (3'-5')                                                                              |
|-------------|-----------------------------------------------------------------------------------------------|
| SM1         | GATCTGATTGGATCCAATATTGAGCATACGCAATATC                                                         |
| SM2         | CTAGCAAGCGCTTTGTATATGTAACCTCCATTAG                                                            |
| SM3         | CTAATGGAGGTTACATATACAAAGCGCTTGCTAG                                                            |
| SM4         | GATCTGATTGTCGACCATGACGCTGGGAATTGG                                                             |
| SM43        | GATCTGATTGGATCCCATAATGACATCATGTTCATGTAC                                                       |
| SM44        | CCTATCACCTCAAATGGTTCGCTATATGTAACCTCCATTAGG                                                    |
| SM45        | CCTAATGGAGGTTACATATAGCGAACCATTTGAGGTGATAGG                                                    |
| SM46        | GAGGTACTAGCAAGCGCTTTGTCCTAGGTACTAAAACAATTCATC                                                 |
| SM47        | GATGAATTGTTTTAGTACCTAGGACAAAGCGCTTGCTAGTACCTC                                                 |
| SM48        | GATCTGATTGTCGACGCAGAGCGCATCGGTCTTTTCG                                                         |
| SM124       | GATTGGTACCGTTACCTAATGGAGG                                                                     |
| SM125       | TTAAGCTCAGCTTATTAATGGTGATGGTGATGGTGTGTTTTATC<br>TGAAGATTGTTCC                                 |
| SM130       | CTGATGGCGTTCGCTAGTAGCATTCCGATTCCGTTTCATAC                                                     |
| SM131       | GTATGAACGGAATCCGAATGCTACTACGAACGCCATCAG                                                       |
| SM132       | GTAGTAGAATTCGGATTTCGCATCATACTTACAAAATATTG                                                     |
| SM133       | CAATATTTTGTAAAGTATGATGCGAATCCGAATTCTACTAC                                                     |
| SM134       | TATATTGCAACGACATTCGCAGCTTCAATGACATTCCGA                                                       |
| SM135       | TCCGAATGTCATTGAAGCTGCGAATGTCGTTGCAATATA                                                       |
| SM165       | GATTGGTACCAATGGAGGTTACATATAATGGAACAAAACTTATTTCC<br>TGAAGAAGATCTGAAGAACAATAAAATTTCTGGTTTTCAATG |
| SM166       | GATTGCTCAGCTTATTATTTGTTTTATCTGAAGATTGTTCTTC                                                   |
| oJP21       | CGGCGCTCAGCTCAGTGGTGGTGGTGGTGGT                                                               |
| oJP22       | TGATGGTACCAACAATGACCTAAGAGGTGTGGATATGAATAAACAC<br>AAGAAAGTTCTATTTTTGG                         |
| oJP25       | TGATGGTACCAATGGAGGTTACATATAA                                                                  |
| oJP26       | CGGCGCTCAGCTTATTATTTGTTTTAT                                                                   |
| oJP30       | TGATGGTACCAATGGAGGTTACATATAATGGAGCAAAACTTATTTCC<br>TGAAGAAGATC                                |
| oJP31       | CGGCGCTCAGCTTATTATTTGTTTTATCTGAAGATTGTTCTCCTCAG                                               |
| F_pKTarO    | GCTTATCAAAGTCGACCTGCAGGCATGCAAGCTTGGCGTAATC                                                   |
| R_pkTarO    | CAACAATGACCTAAGAGGTGTGGATGGATCCCCGGGTACCG                                                     |

|                  |                                                               |
|------------------|---------------------------------------------------------------|
| F_1kb+_sagB      | AAGATATATGTTCAATAAAATAACTTAGTTGGGAATGGGCTTCATTT<br>CAG        |
| R_1kb+_sagB      | GATTACGCCAAGCTTGCATGCCTGCAGGTCGACTTTGATAAGC                   |
| F_1kb(-)_sagB    | CGGTACCCGGGGATCCATCCACACCTCTTAGGTCATTGTTG                     |
| R_1kb(-)_sagB    | ATTGCGAGATTTGGGTTGTTGAGCCATAGTCTTTCTCTTTGATTTAA<br>AAG        |
| F_tetR_sagB      | TTAAATCAAAGAGAAAGACTATGGCTCAACAACCCAAATCTCGCAAT<br>TTG        |
| R_tetR_sagB      | AAGCCCATCCCAACTAAGTTATTTTATTGAACATATATCTTACTTTA<br>TC         |
| oJP32            | CCGGGGATCCCGAAGGTCATGTTTCATTAAAGTATGTTG                       |
| oJP33            | AACTCAAATTGCGAGATTTGGGTTGATCCACACCTCTTAGGTCATTG<br>TTG        |
| oJP35            | GCAGGTCGACCATCAATAATGAATAATATGCCTACAGTTTTAATA                 |
| oJP49            | TTTGATAAGCTACGAGTTGTTTTT                                      |
| oJP50            | ATCCACACCTCTTAGGTCATTGT                                       |
| oJP51            | CTAAGAGGTGTGGATCAACCCAAATCTCGCAAT                             |
| oJP52            | TCGTAGCTTATCAAATAAGTTATTTTATTGAACAT                           |
| oJP53            | GGATCCCCGGGTACCGAG                                            |
| oJP54            | GGTACCCGGGGATCCCGAAGGTCATGTTTCATTAAAGTATG                     |
| oJP79            | TAGAGAATAGGAACTTCATCCACACCTCTTAGGTCATTGTTG                    |
| oJP80            | GAAAGTATAGGAACTTCTTTGATAAGCTACGAGTTGTTTTTATGACT<br>C          |
| oJP81            | CGGCGCTCAGCTTATGCAATACCTCGGATAATTAAGCTTAAAC                   |
| oTD73            | TATTCTCTAGAAAGTATAGGAACTTCGCGAACCATTTGAGGTGATAG<br>GTAAGATTAT |
| oTD74            | TACTTTCTAGAGAATAGGAACTTCTCCTAGGTAATAAACAATTCAT<br>CCAGTAA     |
| oTD145           | CAACCCAAATCTCGCAATTTGAGTTG                                    |
| F_SpdC           | CATCCACTGAATATATGAAGAACAATAAAATTTCTGGTTTTCAATG                |
| R_SpdC           | GCTCGAATTCGGATCCTTATTTGTTTTTATCTGAAGATTGTTCTT                 |
| F_DUET_FLAG_SpdC | CAGATAAAAACAATAAGGATCCGAATTCGAGCTCGG                          |
| R_DUET_FLAG_SpdC | GAAATTTTATTGTTCTTCATATATTCAGTGGATGACCCCCCAG                   |
| F_SagB           | GAGATATACATATGAATAAACACAAGAAAGGTTCTATTTTTGG                   |

|                                  |                                                                                              |
|----------------------------------|----------------------------------------------------------------------------------------------|
| R_SagB                           | GCAAGCTTCTTATTCAAATGTTTACTGTCATCTTTATACAC                                                    |
| F_DUET_SagB                      | ACAGTAAACATTTGAATAAGAAGCTTGCGGCCG                                                            |
| R_DUET_SagB                      | TCTTGTGTTTATTCATATGTATATCTCCTTCTTATACTTAACTAATATA<br>C                                       |
| R_Trunc_SpdC                     | CCGAGCTCGAATTCGGATCCTTATGCAATACCTCGGAT                                                       |
| F_DUET_trunc_SpdC                | ATCCGAGGTATTGCATAAGGATCCGAATTCGAGCTCGG                                                       |
| F_SagB_alone                     | TTAAGAAGGAGATATACCATGAATAAACACAAGAAAGTTCTATTTT<br>TGG                                        |
| R_SagA_alone                     | GCAAGCTTCTTATTCAAATGTTTACTGTCATCTTTATACAC                                                    |
| F_plasmid_SagA                   | ACAGTAAACATTTGAATAAGAAGCTTGCGGCCG                                                            |
| R_plasmid_SagA                   | AGAACCTTTCTTGTGTTTATTCATGGTATATCTCCTTCTTAAAGTTAA<br>AC                                       |
| F_soluble_SagB                   | ATGGCTAGCCAGATATTTTTCAAACATGTTAAATCCG                                                        |
| R_soluble_SagB                   | CATTTGCTGTCCACCAGTCATTTACTTATTCAAATGTTTACTGTCATC                                             |
| F_plasmid_soluble_SagB           | GATGACAGTAAACATTTGAATAAGTAAATGACTGGTGGACAGCAAA<br>TG                                         |
| R_plasmid_soluble_SagB           | GCTAGCCATATGGCTGCCG                                                                          |
| F_SagB_NRIKRLVD_to_<br>SEVNQLLKG | CAAGGGATTGATAAA TCTGAAGTTAACCAATTGCTAAAAGGT<br>AGACCAACGTTATTGAAACATACGGATG                  |
| R_SagB_NRIKRLVD_to_<br>SEVNQLLKG | GTTGGTCTACCTTTTAGCAATTGGTTAACTTCAGATTTATCAATCCC<br>TTGATACTTTGATAAATCTAAAA                   |
| F_SagB_interface_mut             | TCTAGAATTAATCAAATGTTAGACGGTAGACCAACGGAATTGAAACA<br>TACGGATGATTTCTTAAAAGCTG                   |
| R_SagB_interface_mut             | TTC CGT TGG TCT ACC GTC TAA CAT TTG ATT AAT TCTAGATTT<br>ATC AAT CCC TTG ATA CTT TGA TAA ATC |
| F_SpdC_D106R                     | GGTATGTACAGCTTTAATACATTTGCAAGAAGCTTTATTTTATTACAA<br>TCAACAGGC                                |
| R_SpdC_D106R                     | GCC TGT TGA TTG TAA TAA AAT AAA GCT TCT TGC AAA TGT ATT<br>AAA GCT GTA CAT ACC               |
| F_SagB_K118D                     | GTATCAAGGGATTGATAAAAATAGAATTGATCGTATGTTAGTAGATA<br>GACCAACG                                  |
| R_SagB_K118D                     | CGTTGGTCTATCTACTAACATACGATCAATTCTATTTTTATCAATCCT<br>TGATAC                                   |
| R_pETduet_s2_SagB1-5             | TTTCTTGTGTTTATTCATATGTATATCTCCTTCTTATACTTAAC                                                 |
| F_pETduet_SagA5                  | GTTAAGTATAAGAAGGAGATATACATATGAATAAACAC AAGAAA<br>AATTTCAAGTTACGCATTTCAACGC                   |
| F_SagA_TM_with_SagB_o<br>verlap  | CGGATTTAACATGTTTGAACAATTTAGTTTCATTCACGATGAGTAAT<br>ACAGC                                     |

|                                 |                                                                      |
|---------------------------------|----------------------------------------------------------------------|
| R_SagA_TM_with_SagB_o<br>verlap | CGGATTTAACATGTTTGAACAATTTAGTTTCATTACGATGAGTAAT<br>ACAGC              |
| F_SagB_TM_then_SagB_F<br>36     | CTCATTTTTATTTTTCTCAATGATATCCGATACTAAATTGTTTAAAAAT<br>GATGTGAATTA     |
| R_SagB_TM_then_SagB_<br>F36     | GAGTAATTCACATCATTTTTAAACAATTTAGTATCGGATATCATTGAG<br>AAAAATAAAAAATGAG |
| R_SpdC_D106C                    | GCCTGTTGATTGTAATAAAATAAAGCTGCATGCAAATGTATTAAGC<br>TGTACATA           |
| F_SpdC_S107C                    | GTACAGCTTTAATACATTTGCAGATTGCTTTATTTTATTACAATCAAC<br>AGGC             |
| R_SpdC_S107C                    | GCCTGTTGATTGTAATAAAATAAAGCAATCTGCAAATGTATTAAGC<br>TGTAC              |
| F_SagB_N115C                    | TTATCAAAGTATCAAGGGATTGATAAATGTAGAATTAACGTATGTT<br>AGTAGATAGAC        |
| R_SagB_N115C                    | GTCTATCTACTAACATACGTTTAATTCTACATTTATCAATCCCTTGAT<br>ACTTTGATAA       |
| F_SagB_K118C                    | GTATCAAGGGATTGATAAAAATAGAATTTGCCGTATGTTAGTAGATA<br>GACCAACG          |
| R_SagB_K118C                    | CGTTGGTCTATCTACTAACATACGGCAAATTCTATTTTTATCAATCC<br>C TTGATAC         |

Supplementary Table 4. Primers used in this study

| Strain                       | Genotype                                                                                                                                                                                                                                                                 | Source        |
|------------------------------|--------------------------------------------------------------------------------------------------------------------------------------------------------------------------------------------------------------------------------------------------------------------------|---------------|
| RN4220 <i>S. aureus</i>      | Wild-type                                                                                                                                                                                                                                                                | 12            |
| TD011                        | RN4220 <i>S. aureus</i> (pTP44)                                                                                                                                                                                                                                          | 13            |
| HG003 <i>S. aureus</i>       | Wild-type                                                                                                                                                                                                                                                                | 14            |
| TM283                        | <i>S. aureus</i> USA300 cured of pUSA300HOUMR; Tn library host                                                                                                                                                                                                           | 15            |
| SHM002                       | HG003 $\Delta$ <i>spdC</i>                                                                                                                                                                                                                                               | This study    |
| SHM056                       | HG003 $\Delta$ <i>spdC::kan<sup>R</sup></i>                                                                                                                                                                                                                              | This study    |
| SHM226                       | HG003 $\Delta$ <i>spdC::kan<sup>R</sup></i> , pSM_ <i>spdC_Myc</i>                                                                                                                                                                                                       | This study    |
| JP012                        | HG003 <i>sagB::Tn-erm<sup>R</sup></i>                                                                                                                                                                                                                                    | This study    |
| JP051                        | HG003 <i>sagB::Tn-erm<sup>R</sup></i> (pJP15)                                                                                                                                                                                                                            | This study    |
| JP053                        | HG003 <i>sagB::Tn-erm<sup>R</sup></i> (pJP19)                                                                                                                                                                                                                            | This study    |
| JP054                        | HG003 $\Delta$ <i>spdC::kan<sup>R</sup></i> (pJP17)                                                                                                                                                                                                                      | This study    |
| JP061                        | HG003 $\Delta$ <i>spdC::kan<sup>R</sup></i> (pSM_ <i>spdC_E135A</i> )                                                                                                                                                                                                    | This study    |
| JP062                        | HG003 $\Delta$ <i>spdC::kan<sup>R</sup></i> (pSM_ <i>spdC_R139A</i> )                                                                                                                                                                                                    | This study    |
| JP063                        | HG003 $\Delta$ <i>spdC::kan<sup>R</sup></i> (pSM_ <i>spdC_H210A</i> )                                                                                                                                                                                                    | This study    |
| JP064                        | HG003 $\Delta$ <i>spdC::kan<sup>R</sup></i> (pJP22)                                                                                                                                                                                                                      | This study    |
| JP065                        | HG003 $\Delta$ <i>spdC::kan<sup>R</sup></i> <i>sagB::Tn-erm<sup>R</sup></i>                                                                                                                                                                                              | This study    |
| JP128                        | HG003 $\Delta$ <i>spdC::kan<sup>R</sup></i> (pJP42)                                                                                                                                                                                                                      | This study    |
| JP132                        | HG003 $\Delta$ <i>sagB::kan<sup>R</sup></i>                                                                                                                                                                                                                              | This study    |
| BL21(DE3) <i>E. coli</i>     | <i>F- ompT hsdSB(rB- mB-) gal dcm</i> (DE3)                                                                                                                                                                                                                              | Novagen       |
| NovaBlue(DE3) <i>E. coli</i> | <i>endA1 hsdR17</i> (rk12- mk12+) <i>supE44thi-1 recA1 gyrA96 relA1 lac</i> (DE3) <i>F' proAB lacI<sup>Q</sup>ΔM15::Tn10(Tet<sup>R</sup>)gyrA96(nal<sup>R</sup>) thi-1 recA1 relA1 lac glnV44 F[::Tn10 proAB<sup>+</sup> lacI<sup>Q</sup> Δ(lacZ)M15] hsdR17(rk-mK+)</i> | Novagen       |
| <b>Plasmid</b>               | <b>Description</b>                                                                                                                                                                                                                                                       | <b>Source</b> |



|                                          |                                                                                                                               |            |
|------------------------------------------|-------------------------------------------------------------------------------------------------------------------------------|------------|
| pTarKO                                   | <i>cam</i> <sup>R</sup> vector for making gene deletions in <i>S. aureus</i>                                                  | 16         |
| pKFC                                     | <i>cam</i> <sup>R</sup> vector for making gene deletions in <i>S. aureus</i>                                                  | 17         |
| pKFC_spdC_kan                            | pKFC vector to make $\Delta$ spdC:: <i>kan</i> <sup>R</sup> marked deletion in <i>S. aureus</i>                               | This study |
| pKFC_spdC                                | pKFC vector to make $\Delta$ spdC unmarked deletion in <i>S. aureus</i>                                                       | This study |
| pTP63                                    | atc-inducible, integrative <i>cam</i> <sup>R</sup> expression vector for <i>S. aureus</i>                                     | 13         |
| pSM_spdC_myc                             | pTP63-cMyc- <i>spdC</i> containing native <i>spdC</i> ribosome-binding site                                                   | This study |
| pSM_spdC_his                             | pTP63- <i>spdC</i> -His <sub>6</sub> containing native <i>spdC</i> ribosome-binding site                                      | This study |
| pSM_spdC_E135A                           | pTP63- <i>spdC</i> E135A-His <sub>6</sub> containing native <i>spdC</i> ribosome-binding site                                 | This study |
| pSM_spdC_R139A                           | pTP63- <i>spdC</i> R139A-His <sub>6</sub> containing native <i>spdC</i> ribosome-binding site                                 | This study |
| pSM_spdC_H210A                           | pTP63- <i>spdC</i> H210A-His <sub>6</sub> containing native <i>spdC</i> ribosome-binding site                                 | This study |
| pJP15                                    | pTP63- <i>sagB</i> -His <sub>6</sub> containing native <i>sagB</i> ribosome-binding site and 7 amino acid linker              | This study |
| pJP17                                    | pTP63-cMyc- <i>spdC</i> containing native <i>spdC</i> ribosome-binding site                                                   | This study |
| pJP19                                    | pTP63- <i>sagB</i> E155A-His <sub>6</sub> containing native <i>sagB</i> ribosome-binding site and 7 amino acid linker         | This study |
| pJP22                                    | pTP63-cMyc- <i>spdC</i> E135A/R139A/H210A containing native <i>spdC</i> ribosome-binding site                                 | This study |
| pJP42                                    | pTP63-cMyc- <i>spdC</i> [ <i>aa</i> 1-256] containing native <i>spdC</i> ribosome-binding site                                | This study |
| pJP47                                    | pTarKO vector to make $\Delta$ <i>sagB</i> :: <i>kan</i> <sup>R</sup> marked deletion in <i>S. aureus</i>                     | This study |
| pETDuet-FLAG                             | <i>amp</i> <sup>R</sup> vector for dual protein expression                                                                    | 18         |
| pAM174                                   | <i>cam</i> <sup>R</sup> vector for Ulp1 protease expression                                                                   | 19         |
| pET24b(+)- <i>sgtBY181D</i>              | <i>amp</i> <sup>R</sup> -marked <i>S. aureus</i> SgtB <sup>WT</sup> -His <sub>6</sub> expression vector                       | 3          |
| pMW1010                                  | pET28b(+)-His <sub>6</sub> - <i>EF_3129</i> [T36-P429] expression vector for <i>E. faecalis</i> PBPX, <i>kan</i> <sup>R</sup> | 6          |
| <i>ppbp2</i> <sup>S398G</sup>            | pET_42a containing a PBP2 construct with a S398G, TP inactive mutation                                                        | 8          |
| <i>pspdC_sagB</i>                        | pDUET containing a SUMO-FLAG-SpdC and a SagB-His <sub>6</sub>                                                                 | This study |
| <i>pspdC_sagB</i> with TM of <i>SagA</i> | pDUET containing a SUMO-FLAG-SpdC and a SagB-His <sub>6</sub> with the TM of SagA                                             | This study |
| <i>pspdC_sagA</i> with TM of <i>SagB</i> | pDUET containing a SUMO-FLAG-SpdC and a SagA-His <sub>6</sub> with the TM of SagB                                             | This study |
| <i>pspdC</i> alone                       | pDUET containing only SUMO-FLAG-SpdC                                                                                          | This study |
| <i>pspdC</i> <sup>E135A</sup> _sagB      | pDUET containing a SUMO-FLAG-SpdC with E135A mutation and a SagB-His <sub>6</sub>                                             | This study |
| <i>pspdC_sagB</i> <sup>E155A</sup>       | pDUET containing a SUMO-FLAG-SpdC and a SagB-His <sub>6</sub> with a E155A mutation                                           | This study |

|                                               |                                                                                                                                                                       |            |
|-----------------------------------------------|-----------------------------------------------------------------------------------------------------------------------------------------------------------------------|------------|
| pDUET_spdC <sup>D106R</sup> _sagB             | pDUET containing a SUMO-FLAG-SpdC with a D106R mutation and a SagB-His <sub>6</sub>                                                                                   | This study |
| pDUET_spdC_sagB<br><i>interface* mutant</i>   | pDUET containing a SUMO-FLAG-SpdC and a SagB-His <sub>6</sub> the following mutations: N115S, K118N, R119Q, V122D, D123G, L127E                                       | This study |
| pspdC <sup>S107C</sup> _sagB <sup>N115C</sup> | pDUET containing a cysteine pair SUMO-FLAG-SpdC (S107C) and a SagB-His <sub>6</sub> with a N115C                                                                      | This study |
| pspdC <sup>D106C</sup> _sagB <sup>K118C</sup> | pDUET containing a cysteine pair SUMO-FLAG-SpdC (D106C) and a SagB-His <sub>6</sub> with a K118C                                                                      | This study |
| psagB                                         | pDUET containing a full-length SagB-His <sub>6</sub>                                                                                                                  | This study |
| psagB <sup>(33-end)</sup>                     | pET_28(b-) containing a soluble, SagB construct lacking the transmembrane domain (33-end aa)                                                                          | This study |
| pspdC                                         | pDUET containing a SpdC with an amino terminal sumo and flag epitope fusion                                                                                           | This study |
| pspdC <sup>truncated</sup> _sagB              | pDUET containing a truncated SpdC lacking the cytoplasmic carboxy terminus (1-253 aa) with an amino terminal Sumo and flag epitope fusion and a SagB-His <sub>6</sub> | This study |
| pspdC_sagA                                    | pDUET containing a SpdC with an amino terminal sumo and flag epitope fusion and a SagA-His <sub>6</sub>                                                               | This study |

Supplementary Table 5. Strains and plasmids used in this study

## References:

1. Lebar, M. D. *et al.* Forming cross-linked peptidoglycan from synthetic gram-negative Lipid II. *J. Am. Chem. Soc.* **135**, 4632-4635, doi:10.1021/ja312510m (2013).
2. Schaefer, K., Matano, L. M., Qiao, Y., Kahne, D. & Walker, S. In vitro reconstitution demonstrates the cell wall ligase activity of LCP proteins. *Nat. Chem. Biol.* **13**, 396-401, doi:10.1038/nchembio.2302 (2017).
3. Rebets, Y. *et al.* Moenomycin resistance mutations in *Staphylococcus aureus* reduce peptidoglycan chain length and cause aberrant cell division. *ACS Chem. Biol.* **9**, 459-467, doi:10.1021/cb4006744 (2014).
4. Mihelic, M. *et al.* The mechanism behind the selection of two different cleavage sites in NAG-NAM polymers. *IUCrJ* **4**, 185-198, doi:10.1107/S2052252517000367 (2017).
5. Pintar, S., Borisek, J., Usenik, A., Perdih, A. & Turk, D. Domain sliding of two *Staphylococcus aureus* N-acetylglucosaminidases enables their substrate-binding prior to its catalysis. *Commun. Biol.* **3**, 178, doi:10.1038/s42003-020-0911-7 (2020).
6. Welsh, M. A. *et al.* Identification of a Functionally Unique Family of Penicillin-Binding Proteins. *J. Am. Chem. Soc.* **139**, 17727-17730, doi:10.1021/jacs.7b10170 (2017).
7. Qiao, Y. *et al.* Detection of lipid-linked peptidoglycan precursors by exploiting an unexpected transpeptidase reaction. *J. Am. Chem. Soc.* **136**, 14678-14681, doi:10.1021/ja508147s (2014).
9. Qiao, Y. *et al.* Lipid II overproduction allows direct assay of transpeptidase inhibition by beta-lactams. *Nat. Chem. Biol.* **13**, 793-798, doi:10.1038/nchembio.2388 (2017).

9. Grundling, A., Missiakas, D. M. & Schneewind, O. Staphylococcus aureus mutants with increased lysostaphin resistance. *J. Bacteriol.* **188**, 6286-6297, doi:10.1128/JB.00457-06 (2006).
10. Alcorlo, M., Martinez-Caballero, S., Molina, R. & Hermoso, J. A. Carbohydrate recognition and lysis by bacterial peptidoglycan hydrolases. *Curr Opin Struct Biol* **44**, 87-100, doi:10.1016/j.sbi.2017.01.001 (2017).
11. Do, T. *et al.* Staphylococcus aureus cell growth and division are regulated by an amidase that trims peptides from uncrosslinked peptidoglycan. *Nat. Microbiol.* **5**, 291-303, doi:10.1038/s41564-019-0632-1 (2020).
12. Nair, D. *et al.* Whole-genome sequencing of Staphylococcus aureus strain RN4220, a key laboratory strain used in virulence research, identifies mutations that affect not only virulence factors but also the fitness of the strain. *J. Bacteriol.* **193**, 2332-2335, doi:10.1128/JB.00027-11 (2011).
13. Pang, T., Wang, X., Lim, H. C., Bernhardt, T. G. & Rudner, D. Z. The nucleoid occlusion factor Noc controls DNA replication initiation in Staphylococcus aureus. *PLoS Genet.* **13**, e1006908, doi:10.1371/journal.pgen.1006908 (2017).
14. Herbert, S. *et al.* Repair of global regulators in Staphylococcus aureus 8325 and comparative analysis with other clinical isolates. *Infect Immun* **78**, 2877-2889, doi:10.1128/IAI.00088-10 (2010).
15. Coe KA, Lee W, Stone MC, Komazin-Meredith G, Meredith TC, Grad YH, et al. Multi-strain Tn-Seq reveals common daptomycin resistance determinants in *Staphylococcus aureus*. *PLoS Pathog.* **15**, e1007862. doi:10.1371/journal.ppat.1007862 (2019)
16. Lee, W. *et al.* Antibiotic Combinations That Enable One-Step, Targeted Mutagenesis of Chromosomal Genes. *ACS Infect. Dis.* **4**, 1007-1018, doi:10.1021/acsinfecdis.8b00017 (2018).
17. Kato, F. & Sugai, M. A simple method of markerless gene deletion in Staphylococcus aureus. *J. Microbiol. Methods* **87**, 76-81, doi:10.1016/j.mimet.2011.07.010 (2011).
18. Taguchi, A. *et al.* FtsW is a peptidoglycan polymerase that is functional only in complex with its cognate penicillin-binding protein. *Nat. Microbiol.* **4**, 587-594, doi:10.1038/s41564-018-0345-x (2019).
19. Meeske, A. J. *et al.* SEDS proteins are a widespread family of bacterial cell wall polymerases. *Nature* **537**, 634-638, doi:10.1038/nature19331 (2016).

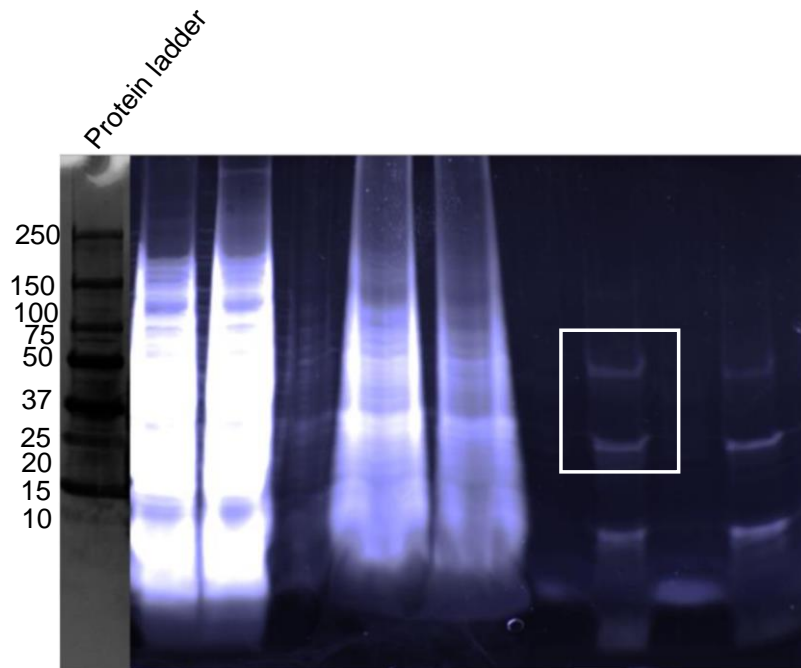

Unmodified gel shown in Supplementary Figure 1.

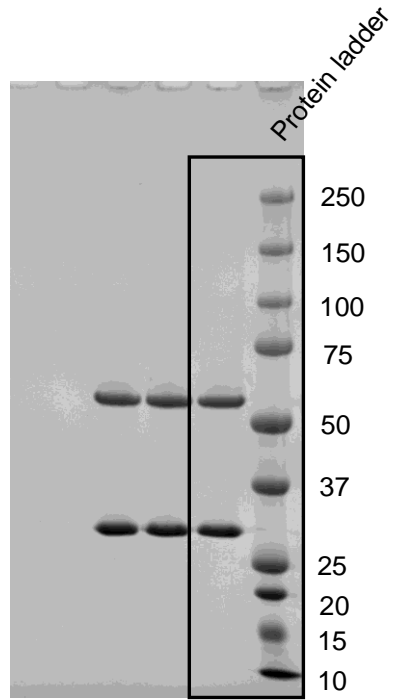

Unmodified gel shown in Supplementary Figure 2.

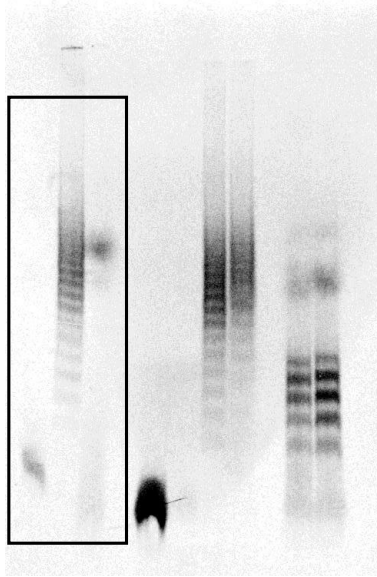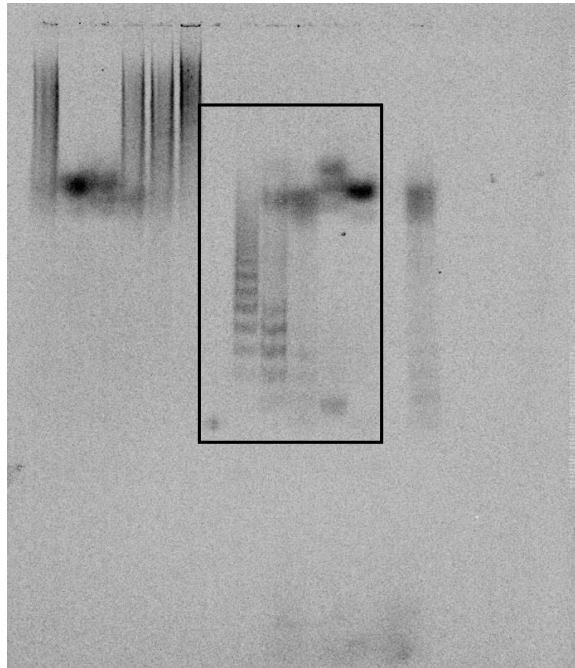

Unmodified autoradiographs shown in Supplementary Figure 4.

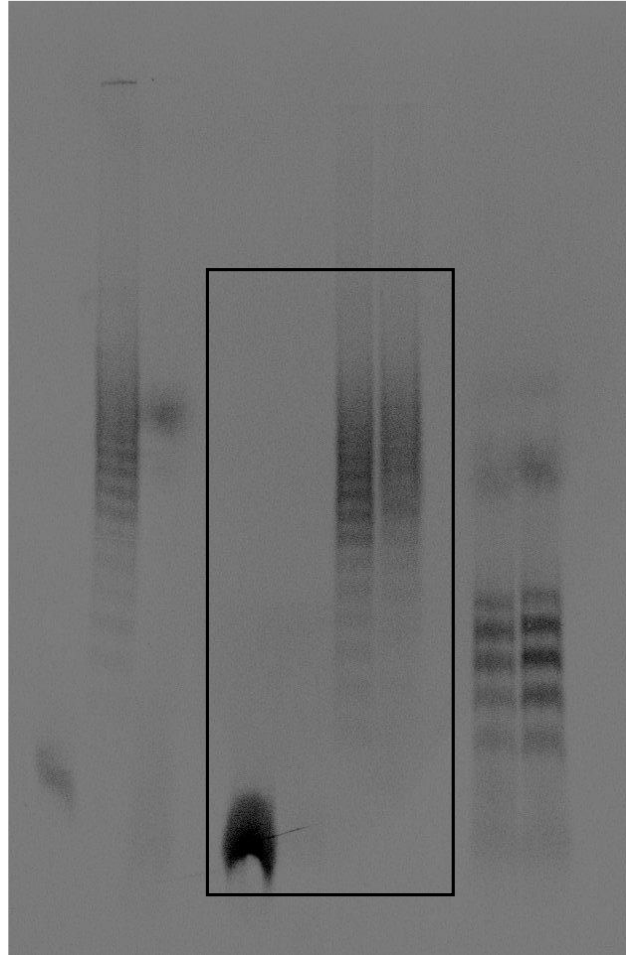

**Unmodified autoradiograph shown in Supplementary Figure 6.**

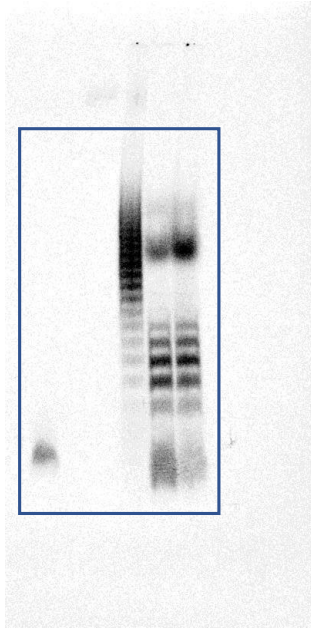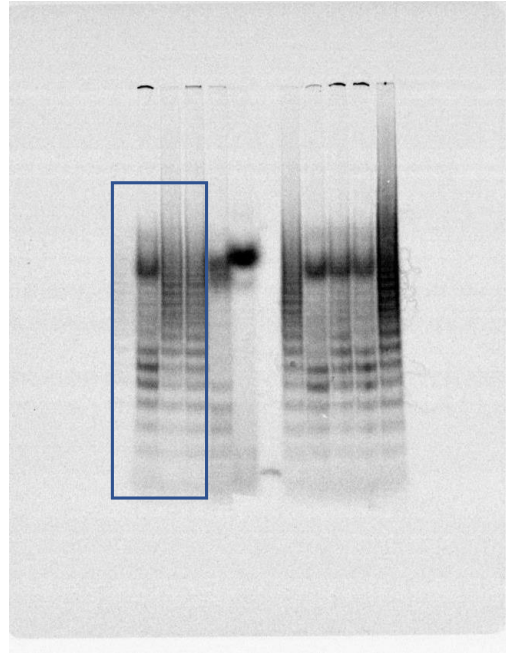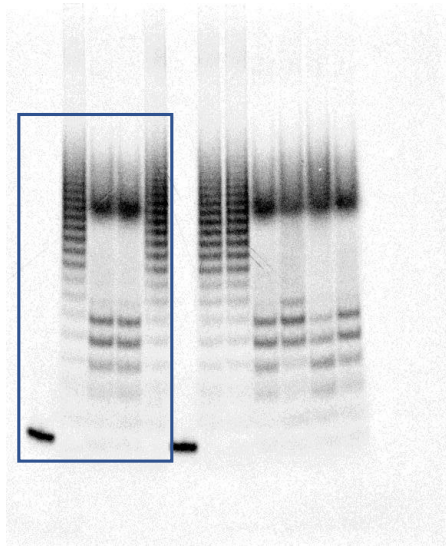

Unmodified autoradiographs shown in Supplementary Figure 9.



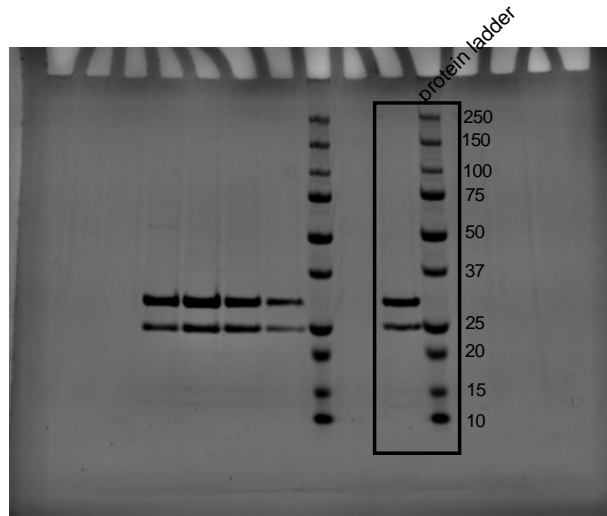

Unmodified gel shown in Supplementary Figure 10.

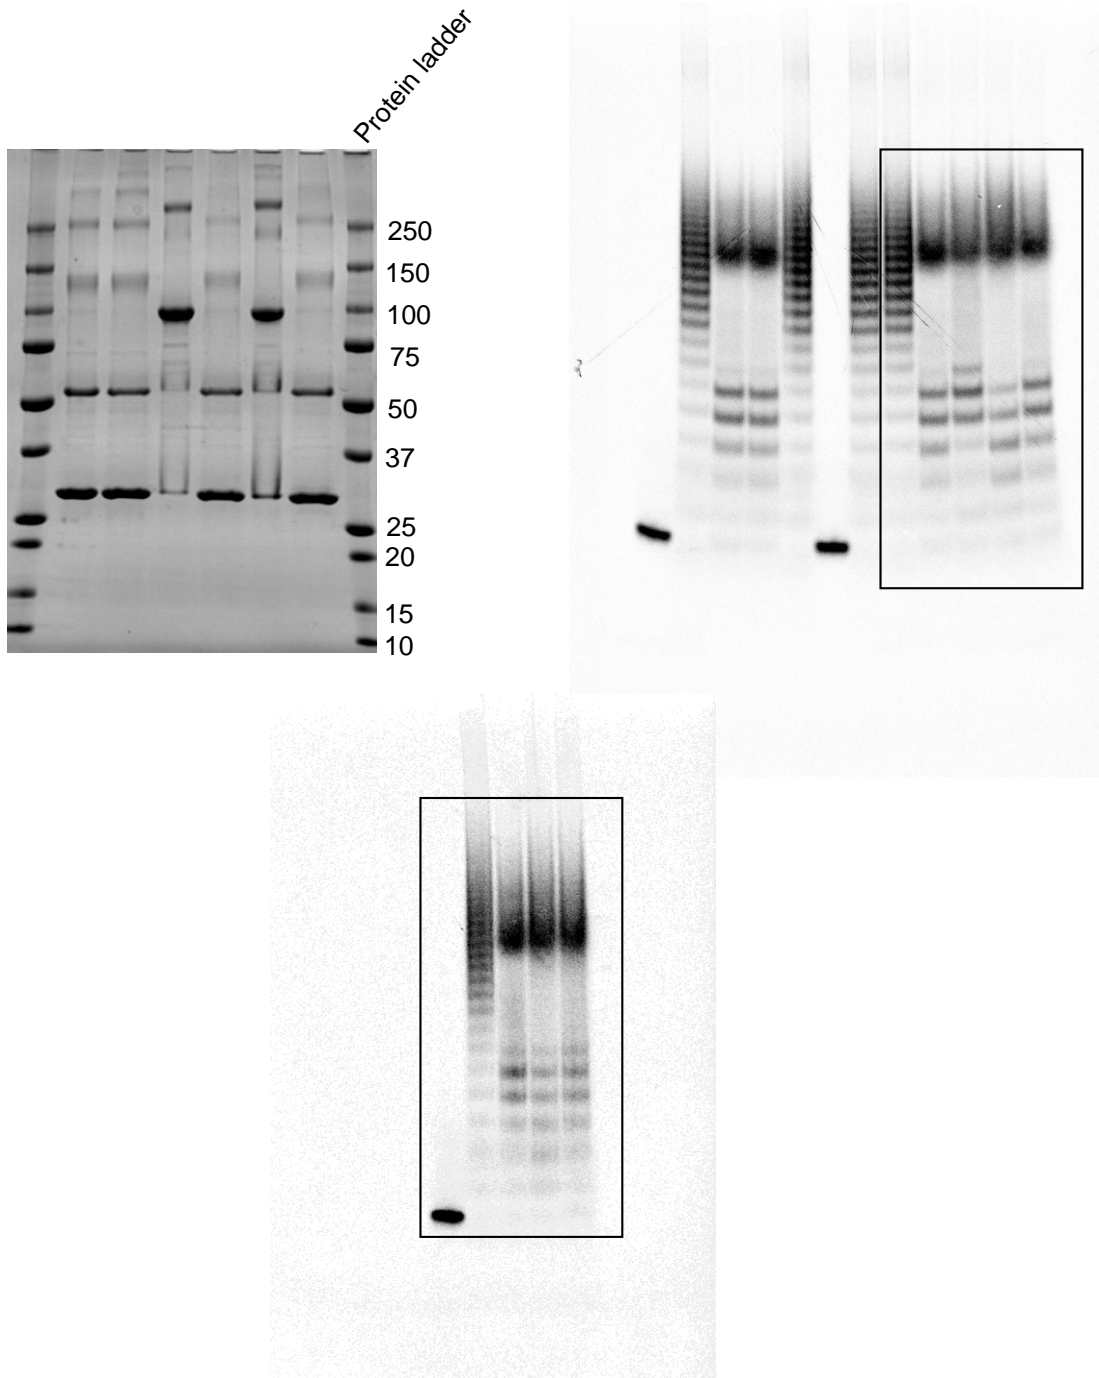

Unmodified gels and autoradiographs shown in Supplementary Figure 12.

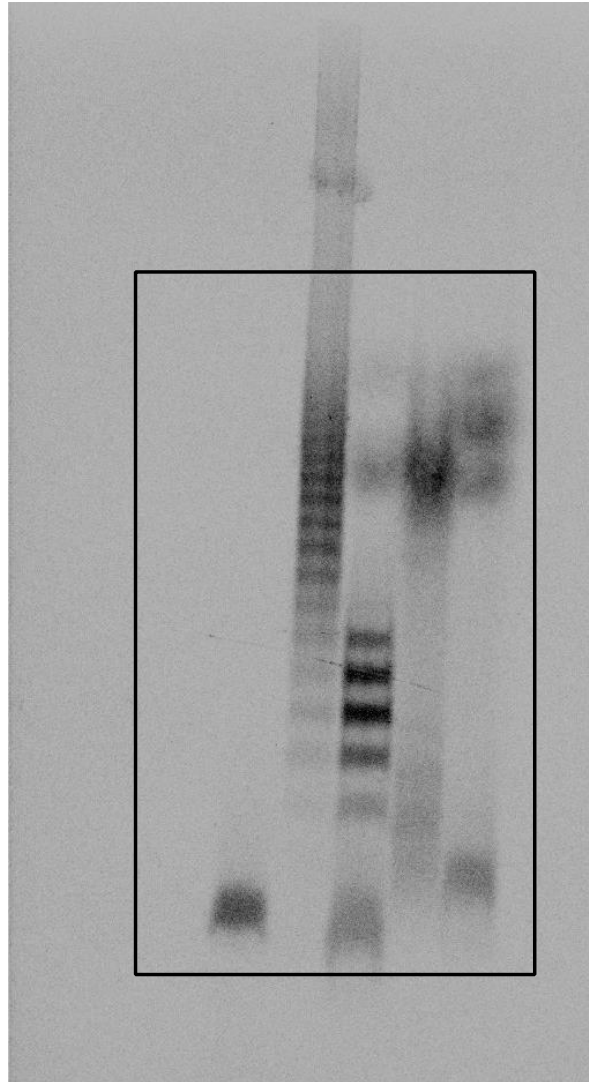

Unmodified autoradiograph shown in Supplementary Figure 15.
